# Supplementary material for: Disulfide bond characterization of endogenous IgG3 monoclonal antibodies using LC-MS: an investigation of IgG3 disulfide-mediated isoforms
Source: Royal Society of Chemistry journal article supplement (doi:10.1039/c6ay01248e), 2016-01-01
Supplement: c6ay01248e1.pdf [file c6ay01248e1.pdf]

# **Disulfide Bond Characterization of Endogenous IgG3 Monoclonal Antibodies Using LC-MS: An Investigation of IgG3 Disulfide-mediated Isoforms.**

Jude C. Lakbub<sup>1</sup>, Daniel F. Clark<sup>1</sup>, Ishan S. Shah<sup>2</sup>, Zhikai Zhu<sup>1</sup>, Eden P. Go<sup>1</sup>, Thomas J. Tolbert<sup>2</sup>, and Heather Desaire<sup>1</sup>

<sup>1</sup>Department of Chemistry, University of Kansas, Lawrence, KS, 66047

<sup>2</sup>Department of Pharmaceutical Chemistry, University of Kansas, Lawrence, KS, 66047

**Supplementary Material**

**Supplementary Figures 1-6:** Data supporting the assignment of disulfide bonds in the constant region of IgG3 monoclonal antibodies. Data from the Fitzgerald antibody is shown. The Sigma antibody produced the same results.

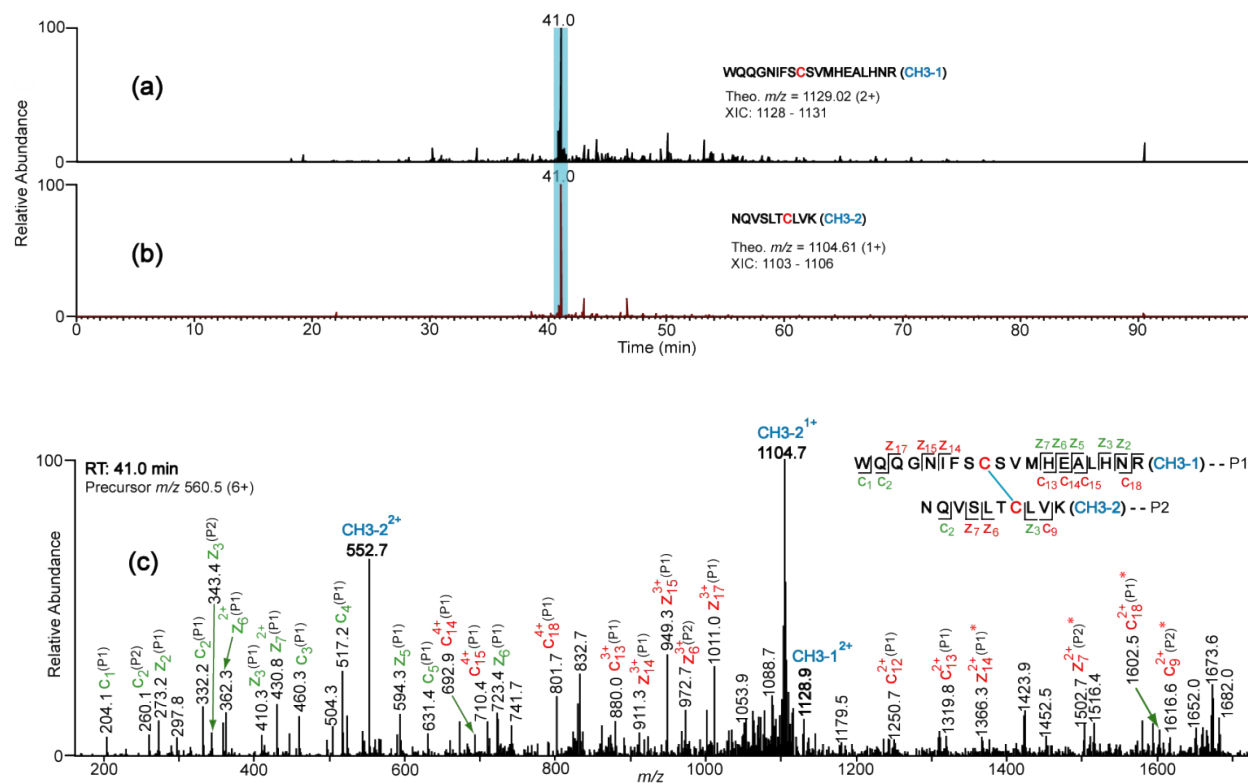

**Supplementary Figure 1.** XIC's (a and b) and ETD spectrum (c) supporting the assignment of the CH3 domain disulfide bond. Asterisks indicate z and c  $\pm 1$  ions

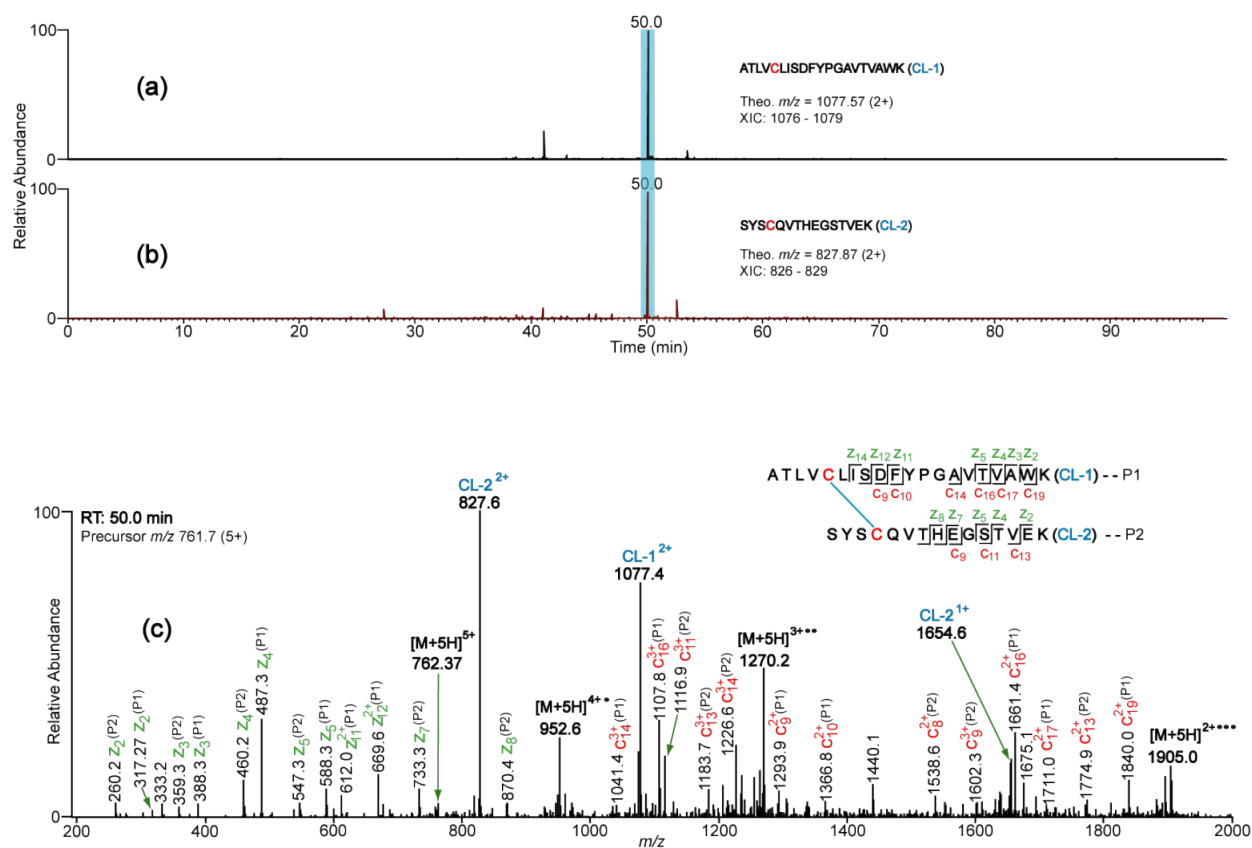

**Supplementary Figure 2.** XIC's (a and b) and ETD spectrum (c) supporting the assignment of the lambda constant light chain disulfide bond

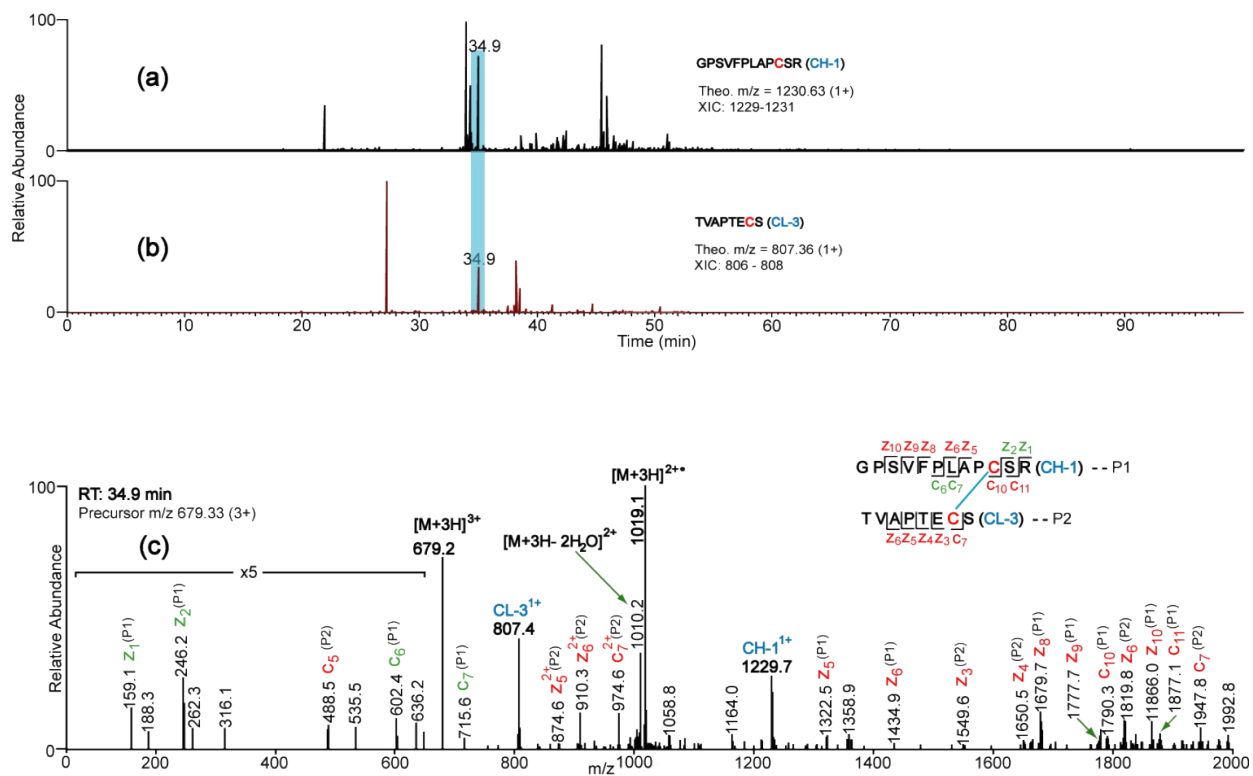

**Supplementary Figure 3.** XIC's (a and b) and ETD spectrum (c) supporting the assignment of the disulfide bond between the heavy chain and the lambda light chain

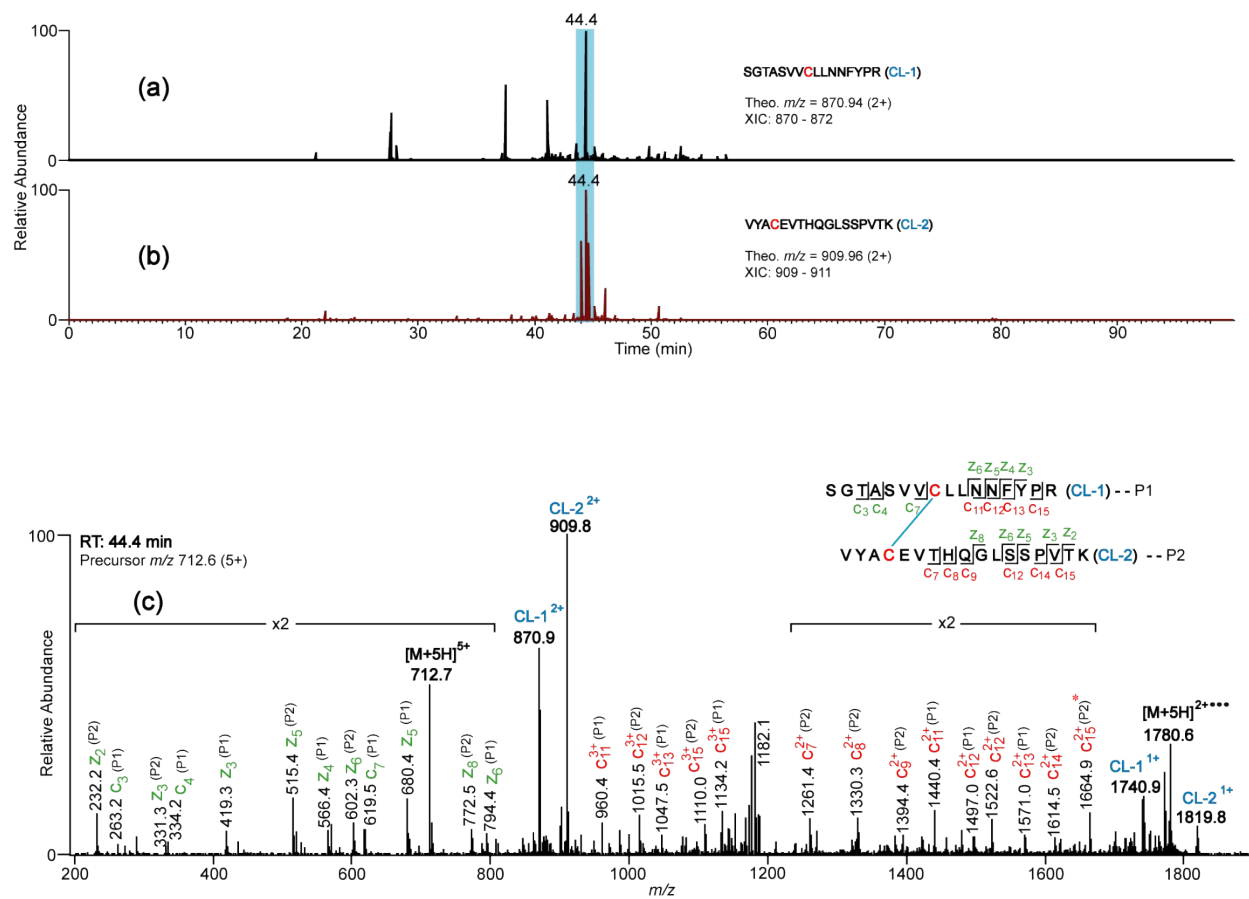

**Supplementary Figure 4.** XIC's (a and b) and ETD spectrum (c) supporting the assignment of the kappa constant light chain disulfide bond

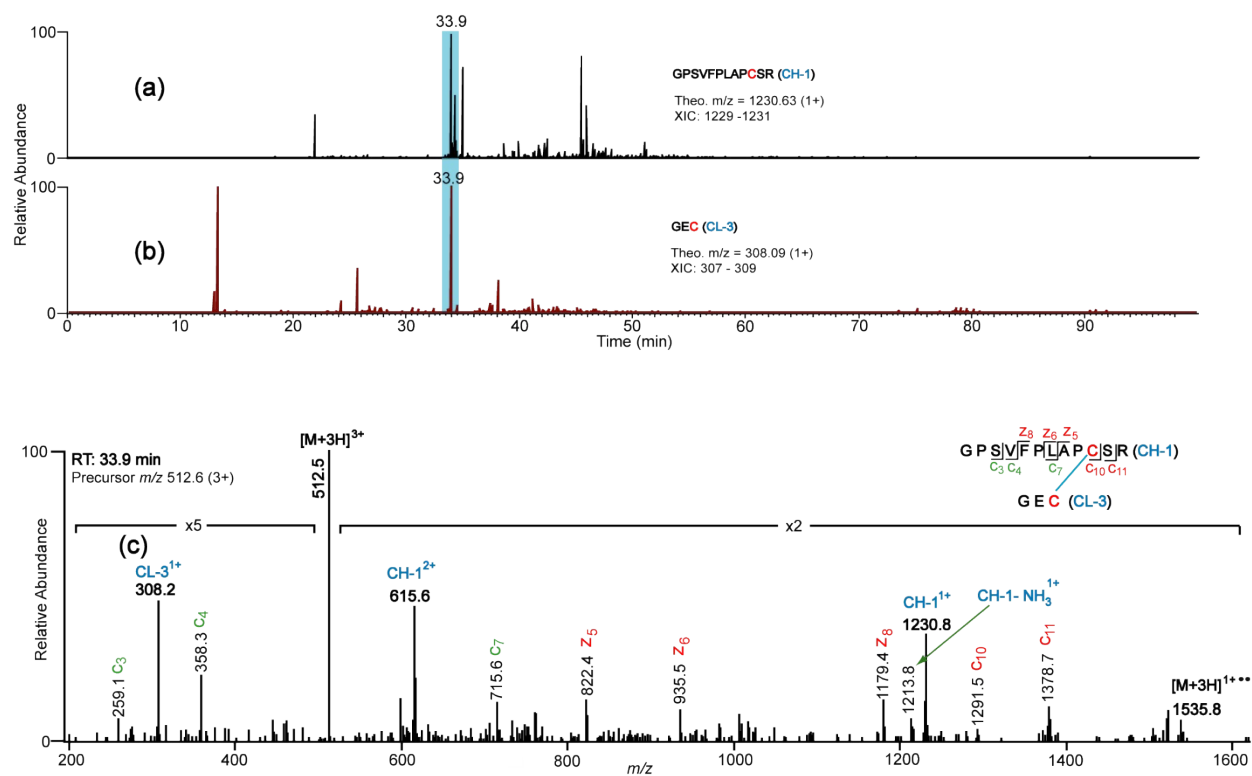

**Supplementary Figure 5.** XIC's (a and b) and ETD spectrum (c) supporting the assignment of the disulfide bond between the heavy chain and the kappa light chain

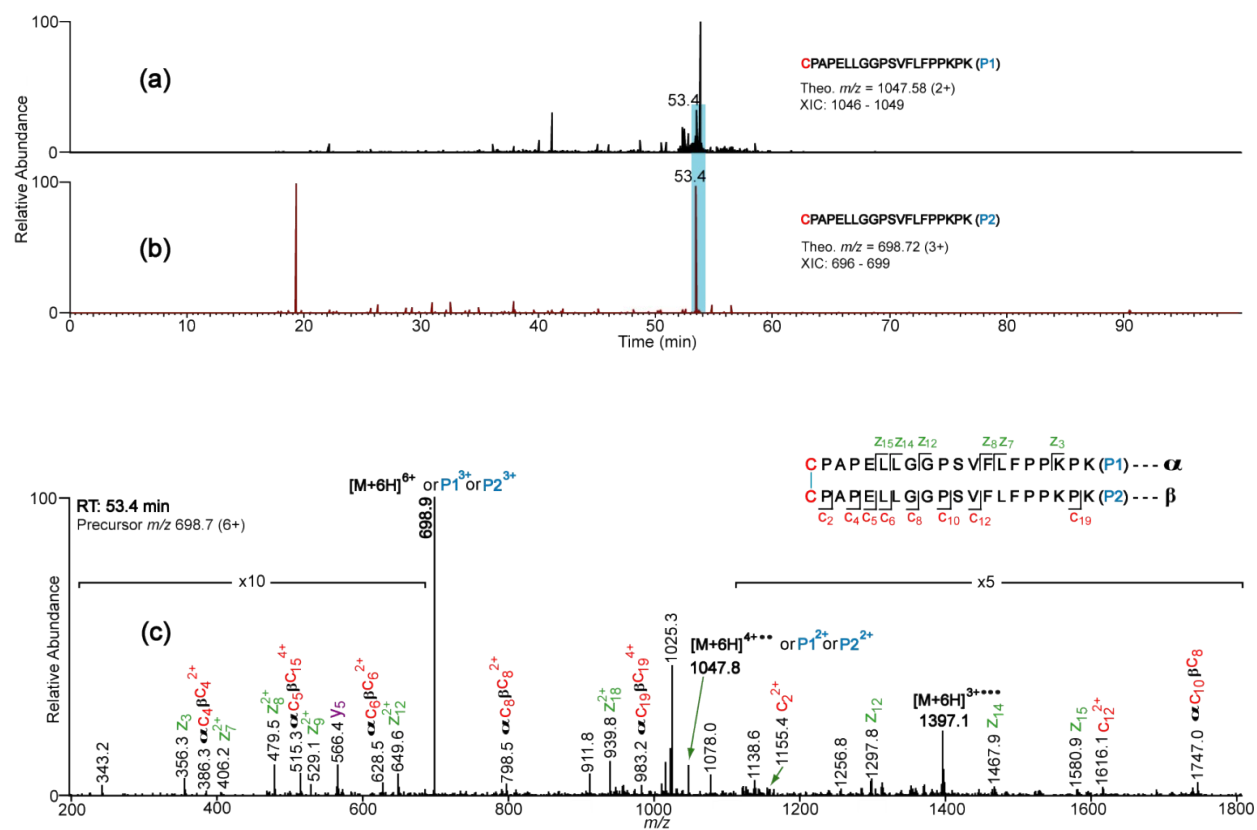

**Supplementary Figure 6.** XIC's (a and b) and ETD spectrum (c) supporting the assignment of the Hinge-4 disulfide bond which links two identical tryptic peptides



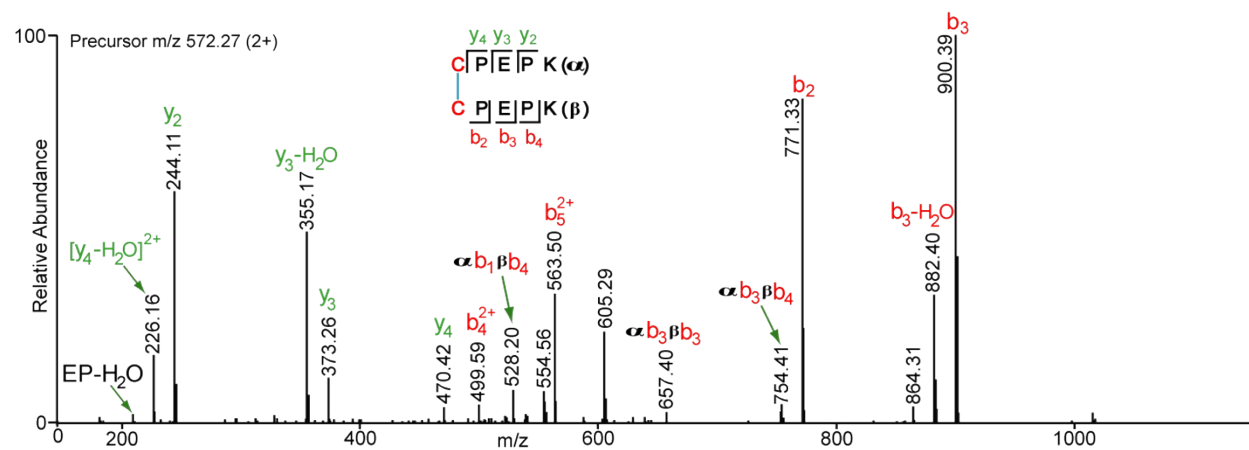

**Supplementary Figure 7.** CID spectrum supporting the assignment of the Hinge-2 disulfide bond

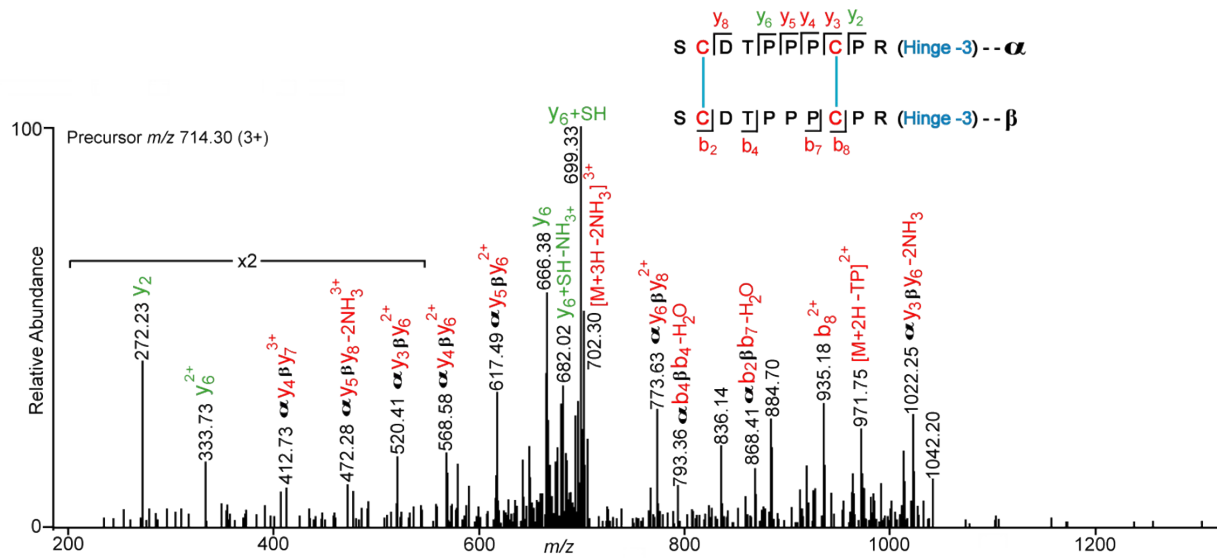

**Supplementary Figure 8.** CID spectrum supporting the assignment of the Hinge-3 disulfide bond

Supplementary Table 1. Summary of Mass Assignments of Disulfide Bonds in Fitzgerald and Sigma IgG3 mAbs Using High Resolution MS Data.

| Tryptic dipeptides              | Position | Theor. m/z | CS | Fitzgerald IgG3 |                  | Sigma IgG3 |                  |
|---------------------------------|----------|------------|----|-----------------|------------------|------------|------------------|
|                                 |          |            |    | Exptl. m/z      | Mass Error (ppm) | Exptl. m/z | Mass Error (ppm) |
| <b>DYFPEPVTVSWNSGAL</b>         | CH1      | 1581.9839  | 5+ | 1581.9953       | 5                | 1581.9974  | 9                |
| <b>TSGVHTFPAVLQSSGL</b>         |          | 1318.4878  | 6+ | 1318.4954       | 6                | 1318.4954  | 5                |
| <b>YSLSSVVTVPSSSLGT</b>         |          | 1130.2763  | 7+ | 1130.2854       | 8                | 1130.2886  | 11               |
| <b>QTYT<b>C</b>NVNHNKPSNTK</b>  |          | 989.1177   | 8+ | 989.1251        | 7                | 989.1251   | 8                |
| <b>STSGGTAALG<b>C</b>LVK</b>    |          | 879.3276   | 9+ | 879.3309        | 4                | 879.3309   | 8                |
| <b><b>C</b>PEPK</b>             | Hinge-2  | 572.2623   | 2+ | 572.2564        | 5                | 572.2602   | 4                |
| <b><b>C</b>PEPK</b>             |          |            |    |                 |                  |            |                  |
| <b><b>S</b>CDTPPP<b>C</b>PR</b> | Hinge-3  | 1070.4394  | 2+ | 1070.4419       | 2                | 1070.4434  | 4                |
| <b><b>S</b>CDTPPP<b>C</b>PR</b> |          | 713.9620   | 3+ | 713.9645        | 4                | 713.9641   | < 1              |
| <b><b>S</b>CDTPPP<b>C</b>PR</b> |          | 535.7234   | 4+ | 535.7264        | 6                | 535.7250   | 3                |
